# Supplementary material
Source: PubMed Central journal article supplement (PMC4929007)
Supplement: NIHMS795717-supplement-supplement_1.pdf [file NIHMS795717-supplement-supplement_1.pdf]

# Supplementary Information

## MATERIALS AND METHODS

**Bacterial strains:** *E. coli* strains with the GFP-ParB/*parS* detection system were provided by Stuart Austin (NIH). These MG1655-derived strains have P1 *parS* inserted at one of six positions around the chromosome. GFP- $\Delta$ 30ParB was expressed from plasmid pALA2705 with no IPTG induction, as described by Nielsen *et al* [1]. Ido Golding (University of Illinois) provided a DH5 $\alpha$ PRO host strain carrying two plasmids for RNA detection: pIG-BAC(P<sub>*lac/ara*</sub>-mRFP1-96bs)-V and pIG-K133(2cTG) [2]. Lucy Shapiro (Stanford) provided *Caulobacter* strains with a *lacO* array inserted at one of four sites in the chromosome and LacI-CFP under control of the endogenous *xylX* promoter [3]. Joe Pogliano (UCSD) provided JP872 (MC4100 *ara* $\Delta$ 714 background), carrying the RK2 plasmid pZZ6 containing a *lacO* array and pGAP60 expressing GFP-LacI [4].

**Growth Conditions:** *E. coli* strains were grown overnight at 37°C in LB medium with the appropriate antibiotics (100  $\mu$ g/mL ampicillin for GFP-ParB/*parS* strains; 30  $\mu$ g/mL kanamycin and 25  $\mu$ g/mL chloramphenicol for RNA-protein particle strain; 100  $\mu$ g/mL ampicillin and 25  $\mu$ g/mL chloramphenicol for JP872). Cultures were diluted 1:100 into M9 minimal medium and grown to an OD<sub>600</sub> of  $\sim$ 0.3-0.5. No induction was required to see chromosomal loci. RNA-protein particles were induced with 100 ng/mL anhydrotetracycline and 1 mM IPTG for  $\sim$ 15 min. To visualize the RK2 plasmid, GFP-LacI was induced with 0.15% arabinose for 15 min, followed by 0.2% glucose for 15 min.

*Caulobacter* were grown at 30°C overnight in PYE medium containing 2  $\mu$ g/mL kanamycin, 5  $\mu$ g/mL streptomycin and 25  $\mu$ g/mL spectinomycin. Cultures were diluted 1:100 into M2G minimal medium and grown to an OD<sub>600</sub> of  $\sim$ 0.2-0.4. Fluorescence was induced by addition of 0.03% xylose for 1 hr.

For biological perturbations, antibiotics were added 30 min prior to imaging at the following concentrations: rifampin (100  $\mu$ g/mL); chloramphenicol (25  $\mu$ g/mL); A22 (10  $\mu$ g/mL); novobiocin (200  $\mu$ g/mL); azide (0.01%) and deoxyglucose (1 mM).

**Microscopy:** Two microliters of media containing cells were placed on a 1% agarose pad made with the appropriate minimal media. *E. coli* were imaged on a Zeiss Axioplan 2 upright microscope; *Caulobacter* were imaged on a Nikon Diaphot 300 inverted microscope. Both species were viewed with a 60X objective lens. Images were collected on a cooled CCD camera (Princeton Instruments, Trenton, NJ) using MetaMorph software (Molecular Devices, Sunnyvale, CA). Time-lapse movies were taken for 100 frames at 1, 2, or 5 s intervals with a 200 ms exposure time.

**Data analysis:** Movies were analyzed with custom software in MatLab (Mathworks, Natick, MA). The position of chromosomal loci and RNA-protein particles was determined by non-linear least squares fitting to a 2-dimensional Gaussian function. These positions were projected onto the long (x) and short (y) axes of the cell to generate a time-series,  $r(t) = (x(t), y(t))$ , for each locus/particle. The ensemble-averaged mean square displacement was calculated for each data set, pooling trajectories from multiple (typically 3-6) movies from different fields of the same slide:  $\langle r^2(\tau) \rangle_{ens} = \frac{1}{N} \sum_n (r_n(\tau) - r_n(0))^2$ , where N is the number of loci/particles. The time-averaged mean square displacement was calculated from a single time-series for each locus/particle:  $\langle r_n^2(\tau) \rangle = \frac{1}{T} \sum_t (r_n(t + \tau) - r_n(t))^2$ , where T is the number of time steps in the trajectory. The velocity autocorrelation function was calculated for a single time-series as:  $C_v(\tau) = \langle v(t + \tau) \cdot v(t) \rangle$ , where  $v(t) = \frac{1}{\delta} (r(t + \delta) - r(t))$  and  $\delta = 1$  s.

**Data simulations:** We simulated movies of diffusing particles with varying signal-to-noise (S/N) ratios to confirm that the subdiffusive motion observed *in vivo* was not an experimental artifact. To generate random walks (diffusive;  $\alpha = 1$ ), a step size  $\delta x$  was chosen from a Gaussian distribution with an experimentally determined standard deviation ( $\sigma = 0.3154 \mu\text{m}$ ). Time-series were constructed such that  $x(t) = x(t-1) + \delta x$ , and similarly for  $y(t)$ . A 2-dimensional Gaussian intensity profile was placed at each position  $(x(t), y(t))$  on top of background noise. Shot noise was introduced by adding a uniformly distributed random number, weighted by the square-root of the intensity at each pixel.

The simulated movies were analyzed in MatLab with the same software used to analyze experimental movies. As shown in Supplemental Figure 1 and Supplemental Table I, apparent subdiffusion can arise at short times from errors in position measurements in noisy images. However, for our experimental S/N ratio ( $\sim$ 3.5), the effect is small. Indeed, Martin *et al* [5] predict a scaling of 0.7-0.9 for our error and diffusion coefficient, while we calculate  $\alpha = 0.94$ . Furthermore, our experimental data exhibit the same scaling for almost 3 decades of time ( $1 - 10^3$  s). If noise were

responsible for the apparent subdiffusion, then we would expect to see a crossover to a larger  $\alpha$  at longer times.

We also simulated movies of varying lengths - between  $10^0$  and  $10^4$  time steps - to investigate the distribution of apparent diffusion coefficients. Our results match those of Saxton, who previously showed that this distribution is very sensitive to the number of time steps in a trajectory [6].

Polymer simulations:

### SUPPLEMENTAL FIGURE 1

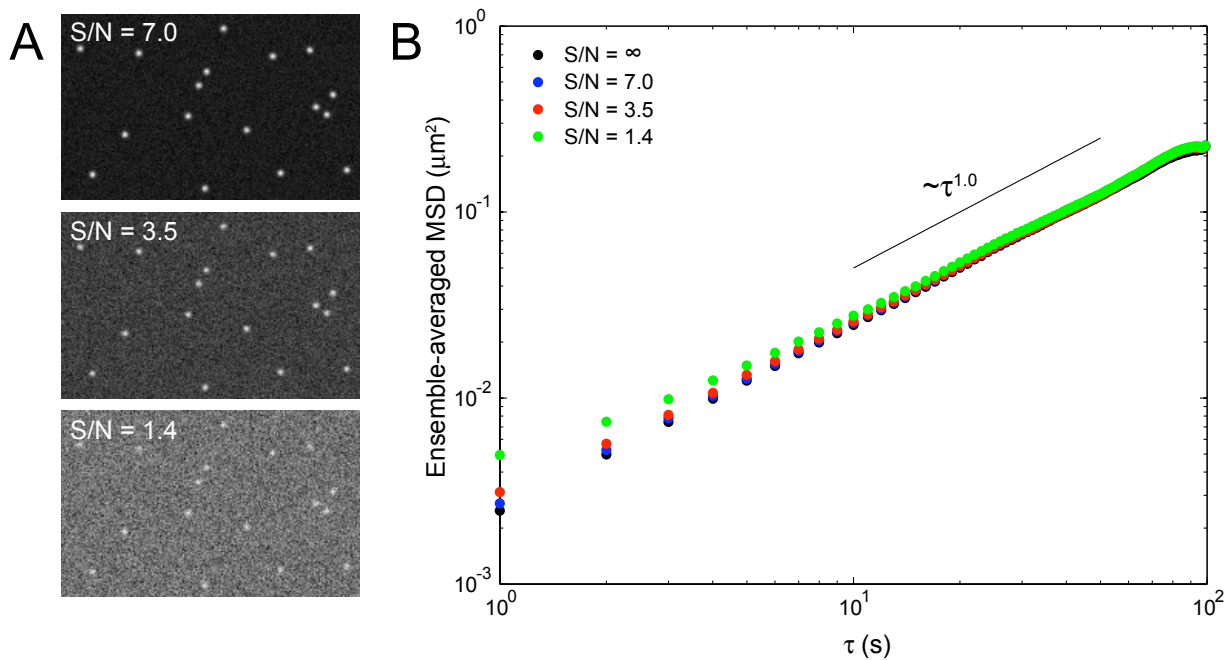

FIG. 1: (A) Snapshots of simulated data with different signal-to-noise ratios. (B) A log-log plot of the ensemble-averaged MSD for data simulated with each S/N ratio. The experimental S/N ratio was  $\sim 3.5$ .

### SUPPLEMENTAL TABLE I

TABLE I: Power laws were fitted to the ensemble-averaged MSD for each S/N ratio.

| S/N | $\sigma$ ( $\mu\text{m}$ ) | $2\sigma^2/4D$ (s) | $\alpha$ |
|-----|----------------------------|--------------------|----------|
| 7.0 | 0.01                       | 0.083              | 0.99     |
| 3.5 | 0.02                       | 0.333              | 0.94     |
| 1.4 | 0.04                       | 1.33               | 0.87     |

- 
- [1] H. J. Nielsen, Y. Li, B. Youngren, F. G. Hansen, and S. Austin, *Mol. Microbiol.* **61**, 383 (2006).  
[2] I. Golding and E. C. Cox, *Phys Rev Lett* **96**, 098102 (2006).  
[3] P. H. Viollier et al., *Proc. Natl. Acad. Sci. USA* **101**, 9257 (2004).  
[4] A. I. Derman, G. Lim-Fong, and J. Pogliano, *Mol. Microbiol.* **67**, 935 (2008).  
[5] D. S. Martin, M. B. Forstner, and J. A. Kas, *Biophys J* **83**, 2109 (2002).  
[6] M. J. Saxton, *Biophys J* **72**, 1744 (1997).
